# Supplementary material
Source: PubMed Central journal article supplement (PMC7953999)
Supplement: jcsm.8692.ds001.pdf [file jcsm.8692.ds001.pdf]

**Table S1: Subgroup analysis in participants with and without concerns regarding menstrual blood leak**

|                         |              | M1           | M2           | MF           | P for interaction |
|-------------------------|--------------|--------------|--------------|--------------|-------------------|
| TIB, min                | Yes (N = 36) | 394.3 ± 60.8 | 367.3 ± 69.8 | 397.2 ± 77.3 | 0.555             |
|                         | No (N = 9)   | 413.7 ± 68.7 | 355.1 ± 81.2 | 402.3 ± 62.6 |                   |
| TST, min                | Yes (N = 36) | 351.0 ± 60.5 | 333.1 ± 68.9 | 367.0 ± 71.8 | 0.376             |
|                         | No (N = 9)   | 380.9 ± 65.9 | 324.3 ± 76.4 | 376.8 ± 61.7 |                   |
| SOL, min                | Yes (N = 36) | 14.0 (25.3)  | 14.3 (16.8)  | 10.3 (13.8)  | 0.857             |
|                         | No (N = 9)   | 15.5 (7.6)   | 16.5 (11.9)  | 14.5 (12.3)  |                   |
| SE, %                   | Yes (N = 36) | 89.2 ± 8.7   | 90.8 ± 6.9   | 93.0 ± 5.6   | 0.695             |
|                         | No (N = 9)   | 92.0 ± 3.4   | 91.4 ± 5.5   | 93.7 ± 4.0   |                   |
| WASO, min               | Yes (N = 36) | 8.5 (9.8)    | 9.5 (12.3)   | 6.5 (8.0)    | 0.520             |
|                         | No (N = 9)   | 17.0 (13.1)  | 8.0 (8.0)    | 9.5 (8.3)    |                   |
| % of REM sleep, %       | Yes (N = 36) | 26.8 ± 6.9   | 25.1 ± 6.1   | 26.9 ± 4.1   | 0.472             |
|                         | No (N = 9)   | 26.6 ± 5.7   | 28.0 ± 4.9   | 28.6 ± 4.3   |                   |
| % of N3 sleep, %        | Yes (N = 36) | 24.6 ± 9.4   | 24.4 ± 7.9   | 24.2 ± 6.7   | 0.453             |
|                         | No (N = 9)   | 22.2 ± 7.9   | 25.0 ± 9.6   | 25.9 ± 5.9   |                   |
| Ar I, events/h of sleep | Yes (N = 36) | 7.2 ± 2.8    | 6.8 ± 2.6    | 6.6 ± 2.0    | 0.133             |
|                         | No (N = 9)   | 8.1 ± 2.7    | 6.0 ± 2.5    | 7.0 ± 3.5    |                   |

**Note:** Continuous data are summarized using the mean ± SD or median (interquartile range).

**Abbreviations:** ArI, arousal index; M1/2, 1<sup>st</sup> and 2<sup>nd</sup> night after menses onset; MF, mid-follicular phase; N3, deep non-REM sleep; REM, rapid eye movement; SE, sleep efficiency, SOL, sleep onset latency; TST, total sleep time; WASO, wake after sleep onset

**Table S2: Subgroup analysis in participants with and without concerns regarding stuffiness around the crotch associated with sanitary products**

|                         |             | M1           | M2           | MF           | P for interaction |
|-------------------------|-------------|--------------|--------------|--------------|-------------------|
| TIB, min                | Yes (N = 9) | 391.0 ± 74.7 | 370.0 ± 90.4 | 407.1 ± 88.7 | 0.771             |
|                         | No (N = 36) | 400.0 ± 59.7 | 363.6 ± 67.3 | 396.0 ± 71.0 |                   |
| TST, min                | Yes (N = 9) | 353.4 ± 58.8 | 326.8 ± 89.0 | 380.9 ± 85.6 | 0.710             |
|                         | No (N = 36) | 357.8 ± 63.6 | 332.5 ± 65.4 | 366.0 ± 65.8 |                   |
| SOL, min                | Yes (N = 9) | 14.0 (22.3)  | 20.5 (23.4)  | 9.0 (11.6)   | 0.412             |
|                         | No (N = 36) | 19.8 (15.0)  | 13.8 (11.5)  | 13.0 (14.5)  |                   |
| SE, %                   | Yes (N = 9) | 91.0 ± 6.8   | 88.8 ± 11.0  | 93.8 ± 5.4   | 0.349             |
|                         | No (N = 36) | 89.4 ± 8.3   | 91.4 ± 5.0   | 93.0 ± 5.3   |                   |
| WASO, min               | Yes (N = 9) | 15.0 (20.4)  | 9.5 (14.5)   | 11.0 (11.9)  | 0.858             |
|                         | No (N = 36) | 8.8 (10.3)   | 8.8 (9.8)    | 6.8 (7.8)    |                   |
| % of REM sleep, %       | Yes (N = 9) | 28.7 ± 4.4   | 28.0 ± 3.8   | 25.3 ± 2.8   | 0.054             |
|                         | No (N = 36) | 26.3 ± 7.0   | 25.1 ± 6.2   | 27.8 ± 4.3   |                   |
| % of N3 sleep, %        | Yes (N = 9) | 28.2 ± 13.7  | 25.0 ± 11.5  | 26.7 ± 8.3   | 0.410             |
|                         | No (N = 36) | 23.1 ± 7.4   | 24.4 ± 7.3   | 24.0 ± 6.0   |                   |
| Ar I, events/h of sleep | Yes (N = 9) | 7.0 ± 2.3    | 6.3 ± 2.4    | 6.4 ± 2.2    | 0.991             |
|                         | No (N = 36) | 7.5 ± 2.9    | 6.8 ± 2.6    | 6.8 ± 2.4    |                   |

**Note:** Continuous data are summarized using the mean ± SD or median (interquartile range).

**Abbreviations:** ArI, arousal index; M1/2, 1<sup>st</sup> and 2<sup>nd</sup> night after menses onset; MF, mid-follicular phase; N3, deep non-REM sleep; REM, rapid eye movement; SE, sleep efficiency, SOL, sleep onset latency; TST, total sleep time; WASO, wake after sleep onset
